# Supplementary material for: Antimicrobial silica particles synthesized via ring-opening grafting of cationic amphiphilic cyclic carbonates: effects of hydrophobicity and structure
Source: Royal Society of Chemistry journal article supplement (doi:10.1039/c6py00194g), 2016-01-01
Supplement: c6py00194g1.pdf [file c6py00194g1.pdf]

## Supporting Information

### Antimicrobial Silica Particles Synthesized via Ring-Opening Grafting of Cationic Amphiphilic Cyclic Carbonates: Effects of Hydrophobicity and Structure

Qingxing Xu<sup>\*\*†</sup>, Chuan Yang<sup>\*\*†</sup>, James L. Hedrick<sup>\*‡</sup> and Yi Yan Yang<sup>\*†</sup>

<sup>†</sup>Institute of Bioengineering and Nanotechnology, 31 Biopolis Way, The Nanos, #04-01,  
Singapore 138669, Singapore.

<sup>‡</sup>IBM Almaden Research Center, 650 Harry Road, San Jose, California 95120, USA.

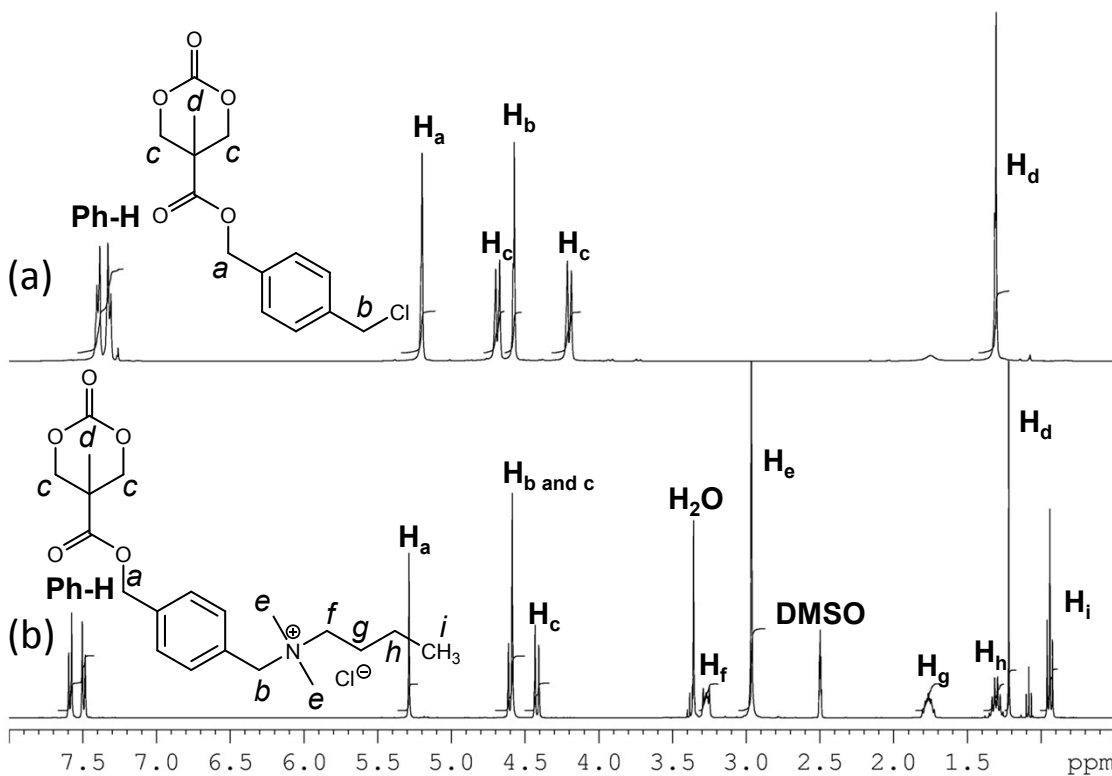

Figure S1 <sup>1</sup>H NMR spectra of (a) MTC-OCH<sub>2</sub>BnCl in CDCl<sub>3</sub> and (b) MTC-Bn-QA-C<sub>4</sub> in DMSO-*d*<sub>6</sub>.

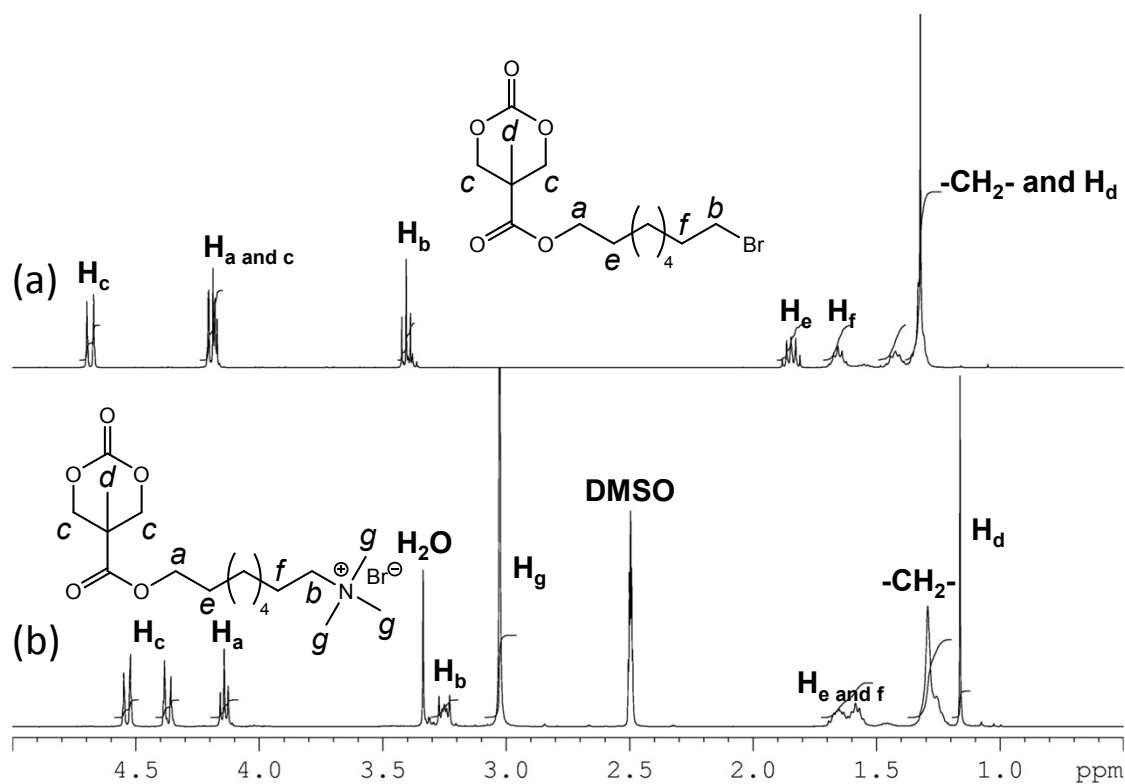

**Figure S2**  $^1\text{H}$  NMR spectra of (a) MTC-OC<sub>8</sub>H<sub>16</sub>Br in CDCl<sub>3</sub> and (b) MTC-C8-QA-Me in DMSO-*d*<sub>6</sub>.

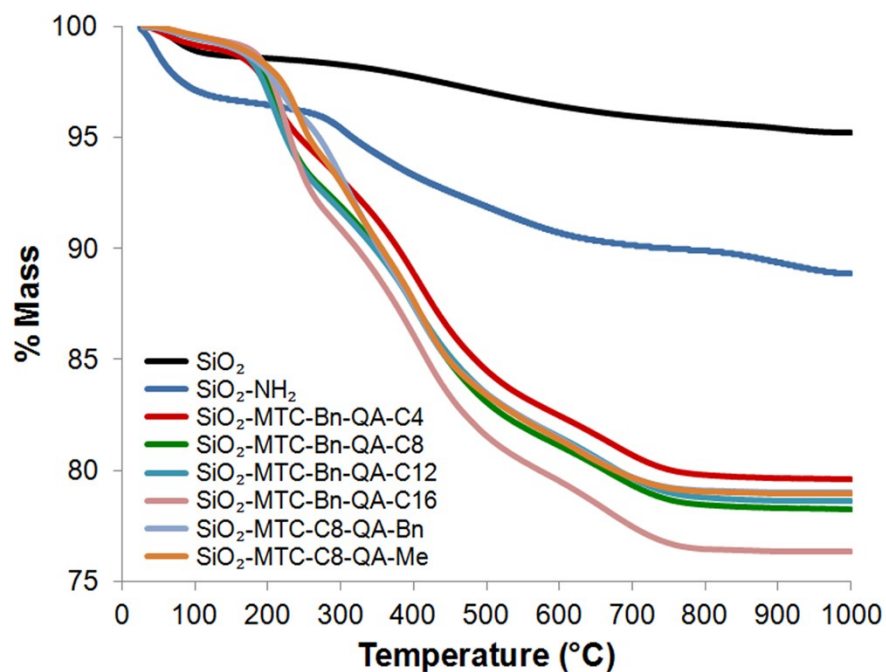

**Figure S3** TGA curves of pristine (SiO<sub>2</sub>), uncoated (SiO<sub>2</sub>-NH<sub>2</sub>) and QA-functionalized silica particles.
